# Supplementary material
Source: MDPI journal article supplement (https://www.mdpi.com/2073-4344/11/6/658)
Supplement: s1 [file s1]

## Supplementary material

### Integrated utilization of dairy whey in probiotic $\beta$ -galactosidase production and enzymatic synthesis of galacto-oligosaccharides

Renfei Zhao<sup>b,c,#</sup>, Feiyu Duan<sup>a,#</sup>, Jingyi Yang<sup>a</sup>, Min Xiao<sup>b,\*</sup>, Lili Lu<sup>a,\*</sup>

<sup>a</sup>*School of Pharmacy, Tongji Medical College, Huazhong University of Science and Technology, 430030 Wuhan, China.*

<sup>b</sup>*State Key Laboratory of Microbial Technology, National Glycoengineering Research Center, Shandong Provincial Key Laboratory of Carbohydrate Chemistry and Glycobiology, Shandong University, 266237 Qingdao, China.*

<sup>c</sup>*Shandong Yuwang Industrial Technology Research Institute., Ltd, 250199 Jinan, China.*

<sup>#</sup> These authors contributed equally to this work

<sup>\*</sup> Corresponding author.

E-mail: minxiao@sdu.edu.cn (M. Xiao); lililu@hust.edu.cn (L. Lu)

Tel/Fax: 86-027-83692745

Table S1 Statistical analysis of variables based on PB design

| Variables | Effect | Coefficient | T value | Pr >   t |
|-----------|--------|-------------|---------|----------|
| Term      |        |             |         |          |
| Constant  |        | -334        | -1.92   | 0.113    |
| A         | 85.50  | 42.75       | 11.88   | 0.000*   |
| B         | 254.0  | 127.0       | 4.41    | 0.007    |
| C         | -79.2  | -39.6       | -1.10   | 0.321    |
| D         | 258.3  | 129.2       | 3.59    | 0.016    |
| E         | -139.2 | -69.6       | -3.87   | 0.012    |
| F         | 57.48  | 28.74       | 8.98    | 0.000*   |

\* Significant variables for enzyme production.

Table S2 ANNOVA for PB design model

| Source | DF | Adj SS | Adj MS | F Value | Pr >   f |
|--------|----|--------|--------|---------|----------|
| Model  | 6  | 672231 | 112039 | 45.06   | 0.000    |
| Linear | 6  | 672231 | 112039 | 45.06   | 0.000    |
| A      | 1  | 350892 | 350892 | 141.11  | 0.000    |
| B      | 1  | 48387  | 48387  | 19.46   | 0.007    |
| C      | 1  | 3008   | 3008   | 1.21    | 0.321    |
| D      | 1  | 32033  | 32033  | 12.88   | 0.016    |
| E      | 1  | 37185  | 37185  | 14.95   | 0.012    |
| F      | 1  | 200725 | 200725 | 80.72   | 0.000    |
| Error  | 5  | 12433  | 2487   |         |          |
| Total  | 11 | 684665 |        |         |          |

Adj SS, Adjusted Sum of Square; Adj MS, Adjusted Mean Square; DF, Degrees of Freedom.
